# Supplementary material
Source: HighWire-hosted journal article supplement (https://openres.ersjournals.com/content/9/2/00341-2022)
Supplement: inline-supplementary-material-1 [file inline-supplementary-material-1.pdf]

Table S1. Comparison between CPET parameters recorded at baseline and 3 months after the initiation of antibody drugs.

|                                   | <b>Baseline</b> | <b>3 months</b> | <b>p†</b> |
|-----------------------------------|-----------------|-----------------|-----------|
| V'O <sub>2</sub> peak, ml/kg/min  | 19 (4.7)        | 19 (5.0)        | 0.753     |
| V'O <sub>2</sub> peak, % pred     | 80 (17)         | 83 (16)         | 0.660     |
| V'O <sub>2</sub> at AT, ml/kg/min | 14 (2.8)        | 13 (2.9)        | 0.405     |
| V'O <sub>2</sub> at AT, % pred    | 64 (19)         | 60 (11)         | 0.359     |
| W peak, watt                      | 117 (38)        | 119 (29)        | 0.801     |
| W peak (% pred.)                  | 76 (18)         | 78 (18)         | 0.889     |
| VE at rest, L/min                 | 17 (3)          | 15 (3)          | 0.035     |
| VE peak, L/min                    | 52 (16)         | 49 (11)         | 0.272     |
| RR at rest, /min                  | 22 (5)          | 19 (5)          | 0.092     |
| RR at AT, /min                    | 25 (8)          | 22 (4)          | 0.241     |
| RR peak, /min                     | 36 (10)         | 31 (6)          | 0.058     |
| BR peak, %                        | 78 (17.4)       | 60 (14.3)       | 0.004     |
| BR peak ≥ 85%                     | 7 (50.0%)       | 0 (0.0%)        | -         |
| O <sub>2</sub> pulse peak, % pred | 90 (24)         | 80 (26)         | 0.345     |
| O <sub>2</sub> pulse peak < 80%   | 5 (35.7%)       | 5 (35.7%)       | -         |
| pO <sub>2</sub> peak, mmHg        | 93 (14)         | 90 (6)          | 0.655     |
| Desaturation                      | 2 (14.3%)       | 0 (0.0%)        | -         |
| VE/V'CO <sub>2</sub> slope        | 24 (6.0)        | 25 (4.5)        | 0.963     |
| VE/V'CO <sub>2</sub> slope ≥ 35   | 1 (7.1%)        | 1 (7.1%)        | -         |
| <b>Interpretation</b>             |                 |                 |           |
| Normal test                       | 2 (14.3%)       | 5 (35.7%)       |           |
| Deconditioning                    | 6 (42.9%)       | 7 (50.0%)       |           |
| Cardiac limitation                | 3 (21.4%)       | 2 (14.3%)       |           |
| Ventilatory impairment            | 7 (50.0%)       | 0 (0.0%)        |           |

† Pair-sample T test was applied for all variables. All continuous variables are shown as mean (sd).

AT: anaerobic threshold; peak: at the peak of exercise; % pred: percentage of the predicted value; V'O<sub>2</sub>: oxygen consumption; W: work load reached (Watt); VE: ventilation; RR: respiratory rate; BR: breathing reserve; pO<sub>2</sub>: partial pressure of oxygen;

Table S2. Comparison of inspiratory pressure values and lung function parameters recorded at baseline between patients under corticosteroid therapy versus OCS-free patients.

|                   | <b>OCS-free (n 7)</b> | <b>Chronic OCS (n 7)</b> | <b>p<sup>®</sup></b> |
|-------------------|-----------------------|--------------------------|----------------------|
| P0.1, kPa         | 0.23 (0.10-0.29)      | 0.47 (0.23-0.53)         | 0.106                |
| MIP, kPa          | 9.7 (4.5-10.3)        | 9.3 (4.8-14.3)           | 0.792                |
| P0.1/MIP (%)      | 2.5 (1.8-4.8)         | 5.0 (2.5-7.0)            | 0.247                |
| FEV1, L           | 1.44 (1.13-1.96)      | 1.86 (1.34-1.99)         | 0.710                |
| FEV1, % predicted | 48 (38-81)            | 56 (51-63)               | 0.535                |
| FVC, L            | 2.79 (1.87-3.68)      | 2.62 (1.86-3.90)         | 0.902                |
| FVC, % predicted  | 79 (54-102)           | 78 (61-83)               | 0.996                |
| RV, L             | 2.71 (2.10-3.00)      | 3.16 (1.78-3.37)         | 0.456                |
| RV, % predicted   | 123 (116-139)         | 131 (127-175)            | 0.318                |
| RAW, % predicted  | 129 (54-171)          | 117 (94-194)             | 0.710                |

<sup>®</sup> Mann-Whitney U test

All continuous variables are shown as median (IQR).

P0.1: pressure generated during the first 0.1 second; MIP: Maximal Inspiratory Pressure; FEV1: Forced Expiratory Volume in the first second; FVC: Forced Vital Capacity; RV: Residual Volume; RAW: Airway Resistance.
